# Supplementary material for: Dramatic Remodeling of the Gut Microbiome Around Parturition and Its Relationship With Host Serum Metabolic Changes in Sows
Source: Front Microbiol. 2019 Sep 12;10:2123. doi: 10.3389/fmicb.2019.02123 (PMC6751307; doi:10.3389/fmicb.2019.02123)
Supplement: Supplementary file 5 [file Table_5.XLSX]

## Sheet: Sheet1
Table S5. Correlation between differential composition of gut microbiota and the changed serum metabolite modules
Metabolite module	Associated microbial feature	P value	Metabolic features	HMDB ID	Description
M29: Conjugate bile acids and derivatives	Lactobacillus	0.00098	8.69_407.2801m/z	HMDB00320	Cholic acid
			6.53_201.0226m/z	HMDB38967	1-Propenyl 1-(1-propenylthio)propyl disulfide
			8.48_375.1837m/z	HMDB41363	18-Oxocortisol
			9.49_473.3230m/z	HMDB35221	Homodolicholide
			8.69_475.2672m/z	HMDB37609	Lucidenic acid C
			9.03_407.2798m/z	HMDB00320	3a,7a,12b-Trihydroxy-5b-cholanoic acid
			6.64_464.3011m/z	HMDB00331	Glycocholic acid
			8.69_556.2540n	HMDB39457	Dipiperamide C
			12.30_327.2542m/z	HMDB31044	Avocadene 2-acetate
			6.53_121.0668m/z	HMDB37625	4-Ethylphenol
			6.97_514.2828m/z	HMDB00889	Taurocholic acid
			8.96_405.2637m/z	HMDB35288	1b-Hydroxycholic acid
			8.69_553.2093m/z	HMDB29626	5alpha-Ethoxy-6beta-hydroxy-5,6-dihydrophysalin B
			7.68_583.3104m/z	HMDB02577	Cholic acid glucuronide
			8.69_915.4888m/z	HMDB40660	(3b,5b,22a,25R)-Furostane-22-methoxy-3,26-diol 3-[glucosyl-(1->2)-glucoside] 26-glucoside
			6.22_199.0079m/z	HMDB41785	Tyrosol 4-sulfate
M33: Bile alcohol and deoxycholic acid	Observed OTU number	0.012	14.57_435.3471m/z	HMDB29851	Cholestane-3,7,12,25-tetrol
			13.16_391.2830m/z	HMDB00384	Deoxycholic acid
			14.34_433.3316m/z	HMDB00359	3a,7a-Dihydroxycoprostanic acid
			13.95_433.3317m/z	HMDB00359	3a,7a-Dihydroxycoprostanic acid
			13.49_437.3274m/z	HMDB02126	27-Nor-5b-cholestane-3a,7a,12a,24,25-pentol
			14.29_464.3496n	HMDB41135	Trihydroxycoprostanoic acid
			16.07_595.4932m/z	HMDB31089	Cholestane-3,7,12,25-tetrol
			14.93_435.3462m/z	HMDB29851	27-Nor-5b-cholestane-3a,7a,12a,24,25-pentol
			14.87_437.3277m/z	HMDB02126	3a,7a-Dihydroxycoprostanic acid
			14.46_433.3313m/z	HMDB00359	Momordol
			13.99_439.3423m/z	HMDB29804	2-Hydroxy-22-methyltetracosanoic acid
			16.13_397.3682m/z	HMDB40909	Cholesteryl acetate
			15.12_473.3631m/z	HMDB35326	Octacosanoic acid
			14.46_537.4150m/z	HMDB34514	Germanicol cinnamate
			14.98_473.3620m/z	HMDB34528	2-Hydroxy-22-methyltetracosanoic acid
			15.85_397.3663m/z	HMDB40909	6-Deoxodolichosterone
			14.99_447.3470m/z	HMDB34423	Glycerol triundecanoate
			16.80_595.4936m/z	HMDB31089	Octacosanoic acid
			14.22_537.4154m/z	HMDB34514	7alpha-Hydroxy-5beta-cholestan-3-one
			14.71_447.3464m/z	HMDB34423	Momordol
			13.46_439.3437m/z	HMDB29804	Octacosanoic acid
			14.33_537.4150m/z	HMDB34514	Germanicol cinnamate
			14.21_433.3314m/z	HMDB00359	3a,7a-Dihydroxycoprostanic acid
			15.20_413.3632m/z	HMDB32296	Trihydroxycoprostanoic acid
			14.04_463.3430m/z	HMDB41135	5b-Cholestane-3a,7a,12a,23S,25-pentol
			14.06_451.3425m/z	HMDB00483	Octacosanoic acid
			12.80_537.4155m/z	HMDB34514	Germanicol cinnamate
			17.03_577.4818m/z	HMDB31089	Cholestane-3,7,12,25-tetrol
M25: Fatty acids and cholesterol	Beta-diversity	0.009	21.79_174.1253n	HMDB34040	(卤)-3-Hydroxynonanoic acid
			21.79_313.2535m/z	C20H34O	(3S,6E,10E)-1,6,10,14-Phytatetraen-3-ol
			21.90_179.0586m/z	HMDB06524	3-Indoleacetonitrile
			21.99_199.1698m/z	HMDB37329	5-Dodecenoic acid
			22.00_175.1322m/z	HMDB34040	(卤)-3-Hydroxynonanoic acid
			22.01_401.1558m/z	HMDB41307	Hemiariensin
			22.54_297.2440m/z	HMDB29978	Alpha-dimorphecolic
			22.57_207.1146m/z	HMDB12286	3-Indolepropionic acid
			22.59_420.2643m/z	HMDB15698	Cinitapride
			22.64_400.3055m/z	HMDB15064	Misoprostol
			22.69_409.2990m/z	HMDB00619	Cholic acid
			22.85_271.2614m/z	HMDB40392	Heptadecanoic acid
			22.93_441.2975m/z	HMDB34349	Hexadecyl ferulate
			23.22_419.3111m/z	HMDB12515	11'-Carboxy-alpha-chromanol
			23.40_329.1534m/z	HMDB38670	Tyrosyl-Phenylalanine
			23.50_403.2291m/z	HMDB34159	Acetyl tributyl citrate
			23.68_435.3615m/z	HMDB11150	25-Methyl-24-methylenecholesterol
			23.73_336.1748m/z	HMDB15087	Naratriptan
			23.76_451.3585m/z	HMDB15157	3-beta-hydroxy-4-beta-methyl-5-alpha-cholest-7-ene-4-alpha-carbaldehyde
			23.87_327.1953m/z	HMDB14602	16a-Hydroxydehydroisoandrosterone
			23.88_465.3722m/z	HMDB29704	4,4-Dimethyl-14alpha-formyl-5alpha-cholesta-8-en-3beta-ol
			23.90_371.2222m/z	HMDB06755	3a,21-Dihydroxy-5b-pregnane-11,20-dione
			23.88_215.0656m/z	HMDB06955	1-Methyl-3-(2-thiazolyl)-1H-indole
			23.51_259.1489m/z	HMDB00027	Tetrahydrobiopterin
			25.85_123.0818m/z	HMDB00787	Sapropterin
